# Supplementary material for: The Expression Pattern of PLIN2 in Differentiated Adipocytes from Qinchuan Cattle Analysis of Its Protein Structure and Interaction with CGI-58
Source: MDPI journal article supplement (doi:10.3390/ijms19051336), 2018-05-01
Supplement: s1 [file s1]

# Supplementary Materials

Table S1. Primer Sequence.

| Gene Name | Primer Sequence/(5'→3')                            | Annealing Temperature/°C | Product Size/bp |
|-----------|----------------------------------------------------|--------------------------|-----------------|
| PLIN2     | F: CTGTCTACCAAGCTCTGCTC<br>R: CGATGCTTCTCTTCCACTCC | 80.2                     | 120             |
| GAPDH     | F: ACCACAGTCCATGCCATCAC<br>R: TCCACCACCCTGTTGCTTA  | 84.9                     | 124             |

Table S2. BiFC results with different PLIN2 and CGI-58 vector in 3T3-L1 cell lines.

| Vectors Name              | Efficiency |
|---------------------------|------------|
| PLIN2-VN173+CGI-58-VC155  | ++         |
| PLIN2-VN173+PLIN2-VC155   | ++         |
| CGI-58-VN173+CGI-58-VC155 | +          |
| CGI-58-VN173+PLIN2-VC155  | +          |

Table S3. GST-pulldown vector of PLIN2 and CGI-58 primers.

| Gene Name  | Primer Sequence/(5'→3')                                                                          |
|------------|--------------------------------------------------------------------------------------------------|
| GST-PLIN2  | F: gatctggttccgcgtggatccGCATCTGTTGCAGTTGAACCAC<br>R: tcagtcagtcacgatgaattcTCAAGAGGAGCTGTCATCTGGC |
| HIS-CGI-58 | F: atcaaaggagatataccatggCGGCAGAGGAGGATGGGG<br>R: atggtgatggtggtgctcgagGTCCACAGTGTACAGATCTCC      |

Table S4. BiFC vector of PLIN2 and CGI-58 primers.

| Gene Name     | Primer Sequence/(5'→3')                                                                         |
|---------------|-------------------------------------------------------------------------------------------------|
| VN-173-PLIN2  | F: caagcttgccgcccgaattcAGCATCTGTTGCAGTTGAACCA<br>R: ggtggcgatggatcttctagaAGAGGAGCTGTCATCTGGCTGG |
| VN-173-CGI-58 | F: caagcttgccgcccgaattcAGCGGCAGAGGAGGATGG<br>R: ggtggcgatggatcttctagaGTCCACAGTGTACAGATCTCCTTC   |
| VC-155-PLIN2  | F: tggccatggaggcccgaattcAGGCATCTGTTGCAGTTGAACC<br>R: acgccgacgggtacctcgagAAGAGGAGCTGTCATCTGGCTG |
| VC-155-CGI-58 | F: tggccatggaggcccgaattcAGGCGGCAGAGGAGGATG<br>R: acgccgacgggtacctcgagAGTCCACAGTGTACAGATCTCCTT   |

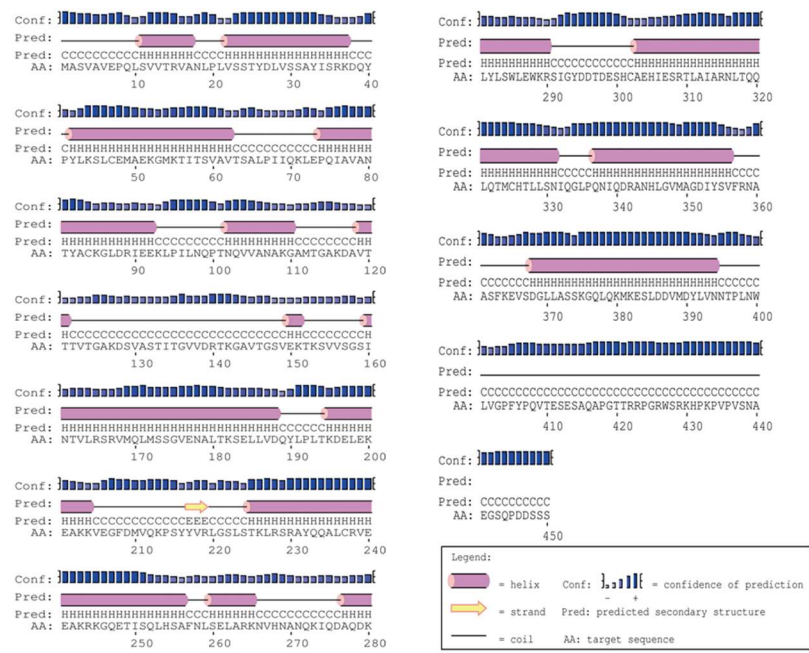

**Figure S1.** visualization of PLIN2 secondary structure of helix, strand and coil. It can be indicated PLIN2 contains helix mainly after prediction.

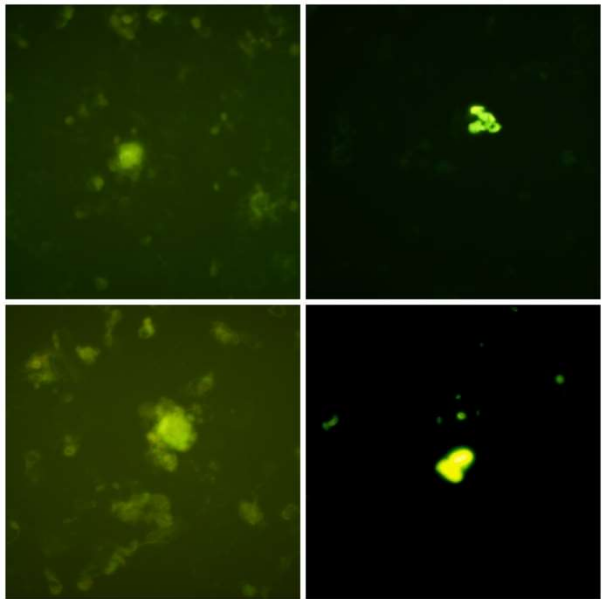

**Figure S2.** visualization of PLIN2 with CGI-58 interaction groups in bovine adipocytes, the fluorescence emissions of the cells were imaged 24h after transfection( a, PLIN2-VC173+CGI-58-VC155, b, PLIN2-VN173+PLIN2-VC155(first line right), c, CGI-58-VN173+CGI-58-VC155, d, CGI-58-VN173+PLIN2-VC155). The strong fluorescence of Venus in cells co-expressing CGI-58-VN173 and PLIN2-VC155, CGI-58-VN173 and CGI-58-VC155 detected by fluorescence microscope demonstrated CGI-58 could interact with PLIN2. The weak fluorescence in other cells were also detected. These results revealed the interacting relationships between PLIN2 and CGI-58 in vivo, including the self-interaction (OLMPUS 200X).

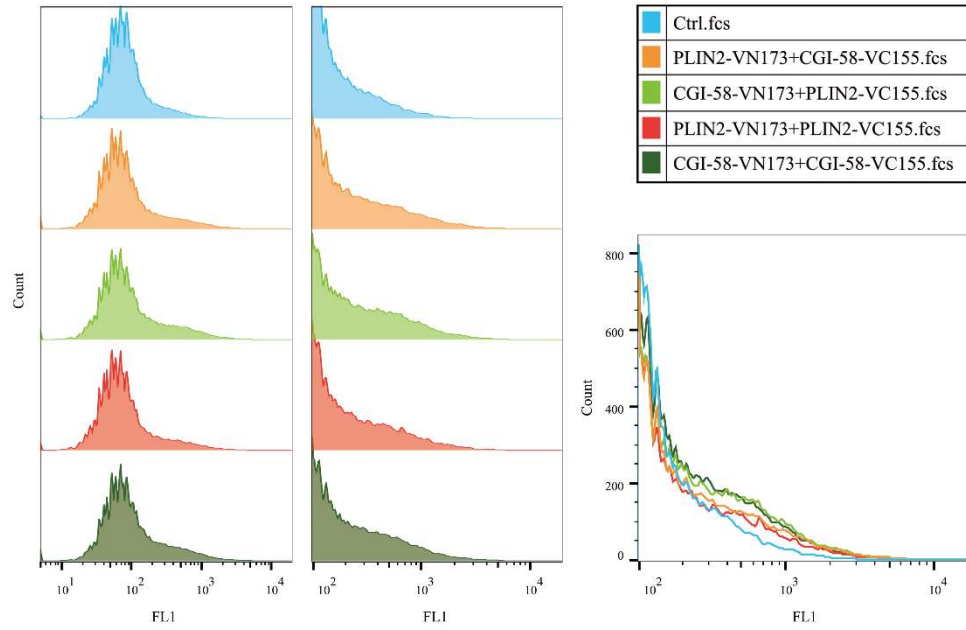

**Figure S3.** Flow cytometry showed all samples harbored the stronger fluorescence intensity than control cells (3T3-L1 cells), although the number of detected cells containing fluorescence are not abundant (**Left**). A noticed data that the fluorescence intensity of cells containing CGI-58-VN173 and PLIN2-VC155, CGI-58-VN173 and CGI-58-VC155 were stronger than cells harboring other protein-protein pairs. Cells harboring higher fluorescence intensity were gated (**Middle**) and then the Counts-Fluorescence intensity distribution of these cells were analyzed by FlowJo® software (**Right**).
